# Supplementary material
Source: MDPI journal article supplement (https://www.mdpi.com/2313-0105/8/9/114)
Supplement: s1 [file s1]

# Brominated porous nitrogen-doped carbon materials for sodium-ion storage

Yuliya V. Fedoseeva <sup>1,\*</sup>, Elena V. Shlyakhova <sup>1</sup>, Svetlana G. Stolyarova <sup>1</sup>, Anna A. Vorfolomeeva <sup>1</sup>, Mariya A. Grebenkina <sup>1</sup>, Anna A. Makarova <sup>2</sup>, Yuriy V. Shubin <sup>1</sup>, Alexander V. Okotrub <sup>1</sup> and Lyubov G. Bulusheva <sup>1,\*</sup>

<sup>1</sup> Nikolaev Institute of Inorganic Chemistry SB RAS, 3 Acad. Lavrentiev Ave., 630090 Novosibirsk, Russia; shlyakhovaev@niic.sbras.ru (E.V.S.); stolyarova@niic.nsc.ru (S.G.S.); vorfolomeeva@niic.nsc.ru (A.A.V.); grmariya@mail.ru (M.A.G.); shubin@niic.nsc.ru (Y.V.S.); spectrum@niic.nsc.ru (A.V.O.);

<sup>2</sup> Physical Chemistry, Institute of Chemistry and Biochemistry, Free University of Berlin, 14195 Berlin, Germany; anna.makarova@fu-berlin.de

\* Correspondence: fedoseeva@niic.nsc.ru (Y.V.F.); bul@niic.nsc.ru (L.G.B.); Tel.: +7-38333-053-52 (L.G.B.)

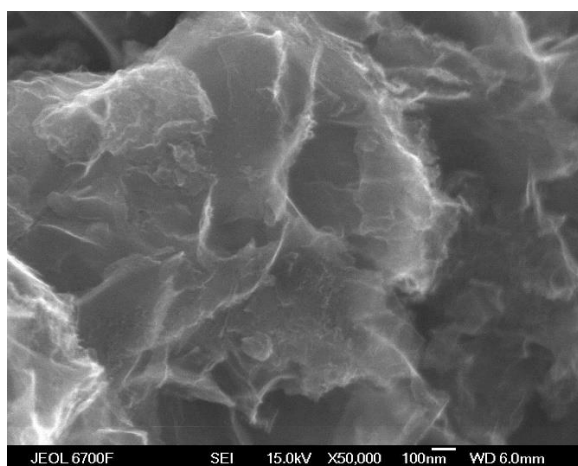

(a)

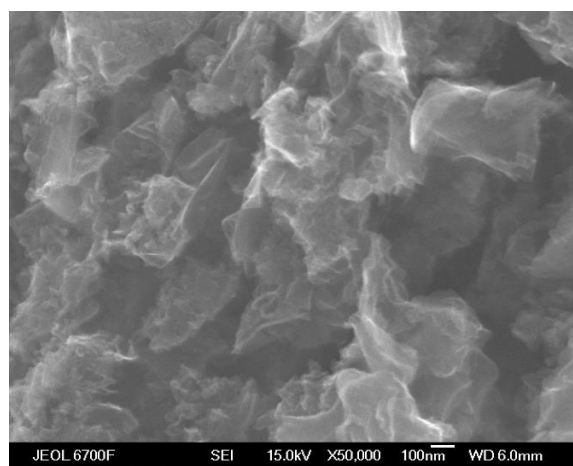

(b)

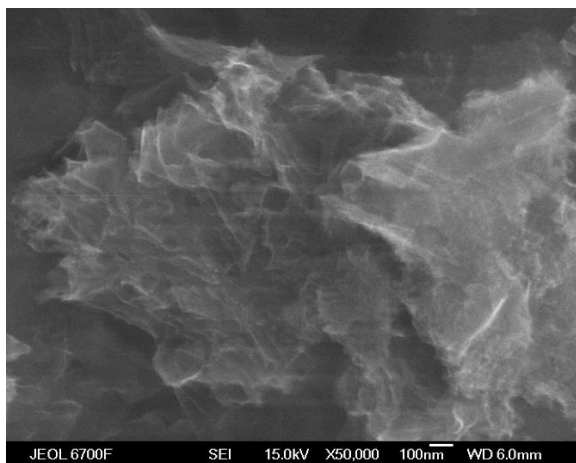

(c)

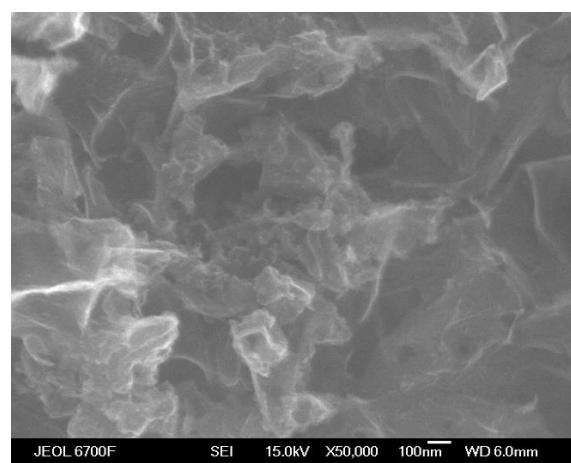

(d)

**Figure S1.** SEM images of (a) PNC, (b) aPNC, (c) Br-PNC and (d) Br-aPNC.

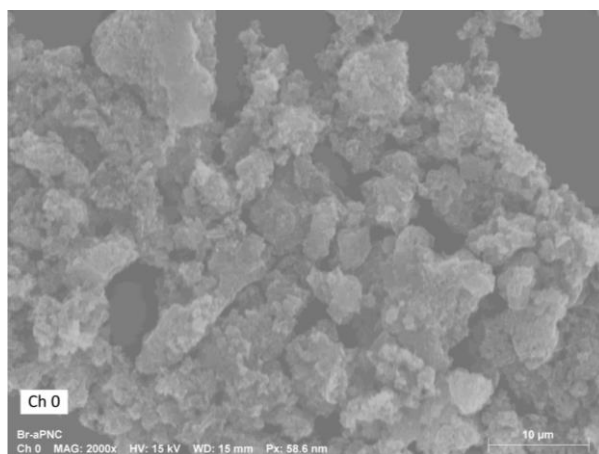

(a)

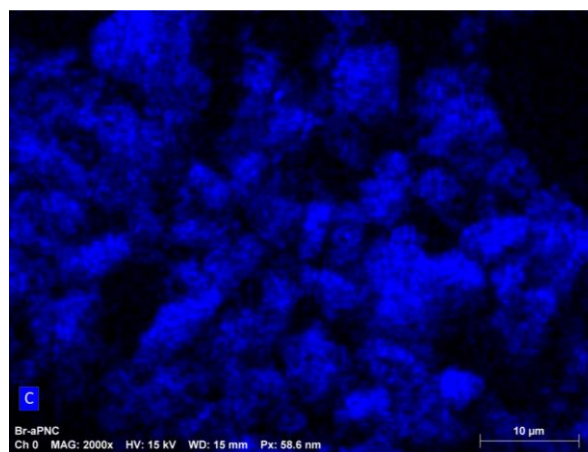

(b)

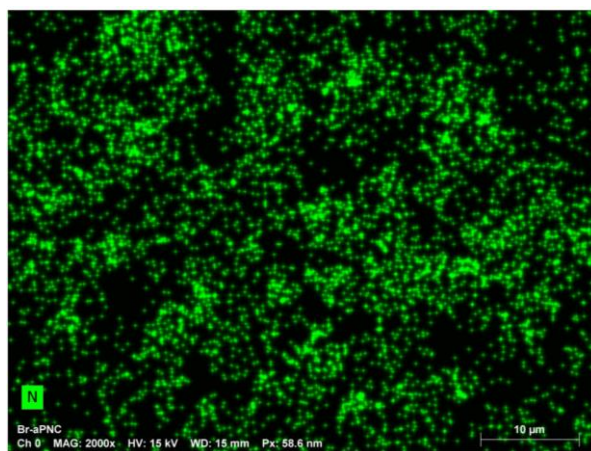

(c)

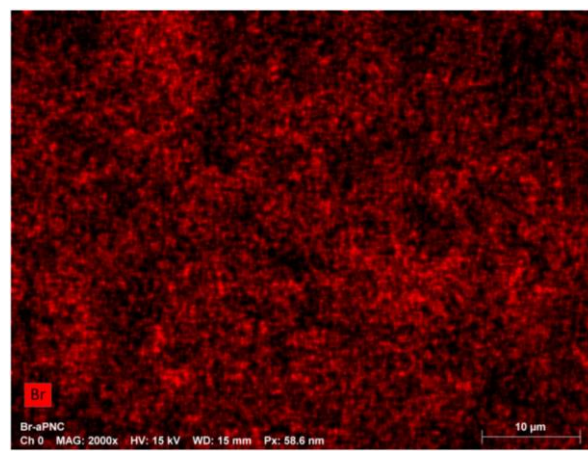

(d)

**Figure S2.** (a) SEM image and energy-dispersive X-ray spectroscopy elemental mapping showing distribution of (b) carbon, (c) nitrogen and (d) bromine in Br-aPNC.
